# Supplementary material for: Diesel and Crude Oil Biodegradation by Cold-Adapted Microbial Communities in the Labrador Sea
Source: PubMed Central journal article supplement (PMC8478444; doi:10.1128/aem.00800-21), 2021-09-28
Supplement: aem.00800-21-s0001.pdf [file aem.00800-21-s0001.pdf]

1 **Supplementary Material**

2 **Nutrient analysis method**

3 Ammonium depletion was monitored using the O-phthalaldehyde (OPA) colorimetric  
4 assay (1-2) after 0, 28, and 71 days incubation. 2 mL of slurry was removed from microcosms  
5 after vigorous shaking, centrifuged, and the supernatant frozen at -20°C until measured. OPA  
6 was used in combination with sodium sulfite and sodium tetraborate to bind with NH<sub>4</sub><sup>+</sup> using  
7 methods allowing for detection of small concentrations. Thawed supernatant (0.5 mL) was mixed  
8 with OPA working reagent at a 1:4 ratio and incubated for 3 hours. Spectrophotometry using a  
9 Synergy™ HTX Multi-Mode Microplate Reader set to 410 nm was used for NH<sub>4</sub><sup>+</sup> concentrations  
10 > 2 μM. Fluorometry using an Agilent Cary Eclipse Fluorescence Spectrophotometer was  
11 required for NH<sub>4</sub><sup>+</sup> concentrations < 2 μM. Standard curves of absorbance and concentration were  
12 created to calculate the concentration in measured samples.

13 **References**

- 14 1. Goyal SS, Rains DW, Huffaker RC. 1988. Determination of ammonium ion by  
15 fluorometry or spectrophotometry after on-line derivatization with o-phthalaldehyde.  
16 *Anal Chem*, 60:175-179.
- 17 2. Holmes RM, Aminot A, K erouel R, Hooker BA, Peterson BJ. 1999. A simple and precise  
18 method for measuring ammonium in marine and freshwater ecosystems. *Can J Fish*  
19 *Aquat*, 56:1801-1808.

20 **Supplementary Tables**

21 **TABLE S1:** Sediment sample metadata.

| <b>Core</b> | <b>Collection<br/>Date<br/>(YYYY-<br/>MM-DD)</b> | <b>Geographic<br/>Location</b> | <b>Latitude</b> | <b>Longitude</b> | <b>Sample<br/>Material</b> | <b>Depth<br/>(mbss<sup>1</sup>)</b> | <b>Sediment<br/>Depth<br/>(cmbsf<sup>2</sup>)</b> | <b>Collection<br/>Method</b> |
|-------------|--------------------------------------------------|--------------------------------|-----------------|------------------|----------------------------|-------------------------------------|---------------------------------------------------|------------------------------|
| <b>1</b>    | 2015-10-27                                       | Labrador Sea                   | 58°55.609 N     | 62°09.326 W      | Sediment                   | 145                                 | 0-5                                               | Box Corer                    |
| <b>2</b>    | 2015-10-27                                       | Labrador Sea                   | 58°55.694 N     | 62°09.412 W      | Sediment                   | 141                                 | 0-5                                               | Box Corer                    |
| <b>3</b>    | 2015-10-27                                       | Labrador Sea                   | 58°55.905 N     | 62°09.458 W      | Sediment                   | 141                                 | 0-5                                               | Box Corer                    |

22

23 <sup>1</sup> meters below sea surface

24 <sup>2</sup> centimetres below sea floor

25 **TABLE S2:** Common diagnostic isomer ratios used as indicators of biodegradation.

| <b>Ratio</b>                         | <b>Treatment</b>         | <b>Diesel</b> | <b>Crude Oil</b> |
|--------------------------------------|--------------------------|---------------|------------------|
| <b>C<sub>17</sub>/Pr<sup>1</sup></b> | Day-0 Pre-treatment      | 2.37 ± 0.03   | 2.17 ± 0.01      |
|                                      | Day-71 Ambient / 0.1%    | 1.54 ± 0.14   | 2.10 ± 0.03      |
|                                      | Day-71 Stimulated / 0.1% | 0.95 ± 0.27   | 1.93 ± 0.05      |
|                                      | Day-71 Ambient / 1%      | 2.24 ± 0.04   | 2.21 ± 0.02      |
|                                      | Day-71 Stimulated / 1%   | 1.34 ± 0.03   | 2.22 ± 0.03      |
| <b>2MN/1MN<sup>2</sup></b>           | Day-0 Pre-treatment      | 1.80 ± 0.003  | 1.56 ± 0.01      |
|                                      | Day-71 Ambient / 0.1%    | 1.30 ± 0.15   | 1.11 ± 0.06      |
|                                      | Day-71 Stimulated / 0.1% | 1.12 ± 0.16   | 1.01 ± 0.12      |
|                                      | Day-71 Ambient / 1%      | 1.69 ± 0.12   | 1.54 ± 0.02      |
|                                      | Day-71 Stimulated / 1%   | 1.79 ± 0.01   | 1.45 ± 0.04      |

26

27 Mean ratios of <sup>1</sup>n-C<sub>17</sub>/pristane (C<sub>17</sub>/Pr) and <sup>2</sup>2-methylnaphthalene/1-methylnaphthalene

28 (2MN/1MN) with standard error, from diesel and crude oil at 0 and 71 days of incubation at 4°C.

29 **TABLE S3:** 16S rRNA sequence read number by sample.

| Sample ID <sup>1</sup> | Original Sequence Reads | Sequence Reads (Chloroplasts Removed) | Rarefied Sequence Reads | Rarefied Sequence Reads (Chloroplasts Removed) |
|------------------------|-------------------------|---------------------------------------|-------------------------|------------------------------------------------|
| Range                  | (4677 - 137595)         | (3793 - 136349)                       | 4677                    | (3501 - 4657)                                  |
| D_T0_1_0_H             | 6364                    | 5155                                  | 4677                    | 3768                                           |
| D_T0_2_0_H             | 13348                   | 11440                                 | 4677                    | 4018                                           |
| D_T0_3_0_H             | 21472                   | 19020                                 | 4677                    | 4123                                           |
| D_T0_1_1_H             | 29345                   | 25033                                 | 4677                    | 3989                                           |
| D_T0_2_1_H             | 44843                   | 40497                                 | 4677                    | 4218                                           |
| D_T0_3_1_H             | 8944                    | 8314                                  | 4677                    | 4324                                           |
| D_T28_1_0_L            | 10531                   | 8630                                  | 4677                    | 3841                                           |
| D_T28_2_0_L            | 8776                    | 7708                                  | 4677                    | 4091                                           |
| D_T28_3_0_L            | 12245                   | 10639                                 | 4677                    | 4055                                           |
| D_T71_1_0_L            | 7520                    | 6203                                  | 4677                    | 3838                                           |
| D_T71_2_0_L            | 13278                   | 11745                                 | 4677                    | 4139                                           |
| D_T71_3_0_L            | 17251                   | 15105                                 | 4677                    | 4073                                           |
| D_T28_1_0_H            | 15564                   | 13558                                 | 4677                    | 4085                                           |
| D_T28_2_0_H            | 15541                   | 14191                                 | 4677                    | 4257                                           |
| D_T28_3_0_H            | 10798                   | 9528                                  | 4677                    | 4138                                           |
| D_T71_1_0_H            | 26216                   | 23642                                 | 4677                    | 4215                                           |

|              |       |       |      |      |
|--------------|-------|-------|------|------|
| D_T71_2_0_H  | 71671 | 66965 | 4677 | 4377 |
| D_T71_3_0_H  | 20761 | 19042 | 4677 | 4297 |
| D_T28_1_01_L | 39550 | 39340 | 4677 | 3501 |
| D_T28_2_01_L | 22505 | 20813 | 4677 | 4337 |
| D_T28_3_01_L | 13630 | 12037 | 4677 | 4134 |
| D_T71_1_01_L | 10089 | 9558  | 4677 | 4144 |
| D_T71_2_01_L | 6102  | 5786  | 4677 | 4422 |
| D_T71_3_01_L | 27040 | 25358 | 4677 | 4404 |
| D_T28_1_01_H | 30390 | 29556 | 4677 | 4537 |
| D_T28_2_01_H | 59855 | 58462 | 4677 | 4567 |
| D_T28_3_01_H | 35321 | 26835 | 4677 | 4517 |
| D_T71_1_01_H | 10490 | 9833  | 4677 | 4385 |
| D_T71_2_01_H | 10744 | 10613 | 4677 | 4621 |
| D_T71_3_01_H | 8416  | 7468  | 4677 | 4510 |
| D_T28_1_1_L  | 4677  | 3793  | 4677 | 3793 |
| D_T28_2_1_L  | 6511  | 5739  | 4677 | 4096 |
| D_T28_3_1_L  | 65628 | 63718 | 4677 | 4334 |
| D_T71_1_1_L  | 14381 | 13320 | 4677 | 4341 |
| D_T71_2_1_L  | 12667 | 12293 | 4677 | 4547 |
| D_T71_3_1_L  | 6653  | 6419  | 4677 | 4485 |
| D_T28_1_1_H  | 28800 | 28658 | 4677 | 4655 |
| D_T28_2_1_H  | 52680 | 51957 | 4677 | 4619 |
| D_T28_3_1_H  | 22232 | 21305 | 4677 | 4655 |

|              |       |       |      |      |
|--------------|-------|-------|------|------|
| D_T71_1_1_H  | 11586 | 11440 | 4677 | 4619 |
| D_T71_2_1_H  | 6691  | 6586  | 4677 | 4618 |
| D_T71_3_1_H  | 28790 | 26356 | 4677 | 4434 |
| C_T0_1_0_H   | 20813 | 18655 | 4677 | 4210 |
| C_T0_2_0_H   | 10337 | 9747  | 4677 | 4415 |
| C_T0_3_0_H   | 25240 | 23701 | 4677 | 4377 |
| C_T0_1_1_H   | 42408 | 36541 | 4677 | 4018 |
| C_T0_2_1_H   | 29548 | 28007 | 4677 | 4428 |
| C_T0_3_1_H   | 28424 | 26919 | 4677 | 4424 |
| C_T28_1_0_L  | 23827 | 22102 | 4677 | 4369 |
| C_T28_2_0_L  | 26189 | 25227 | 4677 | 4527 |
| C_T28_3_0_L  | 83895 | 79925 | 4677 | 4460 |
| C_T71_1_0_L  | 11902 | 11068 | 4677 | 4367 |
| C_T71_2_0_L  | 12896 | 12440 | 4677 | 4511 |
| C_T71_3_0_L  | 27776 | 26729 | 4677 | 4493 |
| C_T28_1_0_H  | 35228 | 33030 | 4677 | 4404 |
| C_T28_2_0_H  | 24451 | 23579 | 4677 | 4524 |
| C_T71_1_0_H  | 26451 | 25369 | 4677 | 4465 |
| C_T71_2_0_H  | 30988 | 30166 | 4677 | 4555 |
| C_T28_1_01_L | 25990 | 24011 | 4677 | 4315 |
| C_T28_2_01_L | 33887 | 33092 | 4677 | 4576 |
| C_T71_1_01_L | 35454 | 33698 | 4677 | 4445 |
| C_T71_2_01_L | 31625 | 30999 | 4677 | 4585 |

|              |        |        |      |      |
|--------------|--------|--------|------|------|
| C_T28_1_01_H | 23202  | 22641  | 4677 | 4564 |
| C_T28_2_01_H | 23769  | 21732  | 4677 | 4301 |
| C_T28_3_01_H | 28960  | 28627  | 4677 | 4630 |
| C_T71_1_01_H | 24957  | 24738  | 4677 | 4637 |
| C_T71_2_01_H | 26343  | 26208  | 4677 | 4657 |
| C_T71_3_01_H | 18314  | 18224  | 4677 | 4650 |
| C_T28_1_1_L  | 42162  | 41859  | 4677 | 4649 |
| C_T28_2_1_L  | 44713  | 43745  | 4677 | 4563 |
| C_T28_3_1_L  | 25836  | 25182  | 4677 | 4560 |
| C_T71_1_1_L  | 29582  | 27810  | 4677 | 4391 |
| C_T71_2_1_L  | 21644  | 21292  | 4677 | 4604 |
| C_T71_3_1_L  | 118420 | 114834 | 4677 | 4557 |
| C_T28_1_1_H  | 30586  | 29720  | 4677 | 4550 |
| C_T28_2_1_H  | 29181  | 28986  | 4677 | 4649 |
| C_T28_3_1_H  | 23981  | 23813  | 4677 | 4653 |
| C_T71_1_1_H  | 28849  | 28278  | 4677 | 4590 |
| C_T71_2_1_H  | 137595 | 136349 | 4677 | 4640 |
| C_T71_3_1_H  | 27068  | 26909  | 4677 | 4652 |

30

31 <sup>1</sup>Sample IDs indicate the petroleum product (D = diesel, C = crude oil), time point (T0, T28, or  
32 T71), sediment core (1, 2, 3), hydrocarbon concentration (0, 0.1, or 1% v/v), and nutrient  
33 availability (L = low/ambient, H = high/stimulated).

34 **Supplementary Figures**

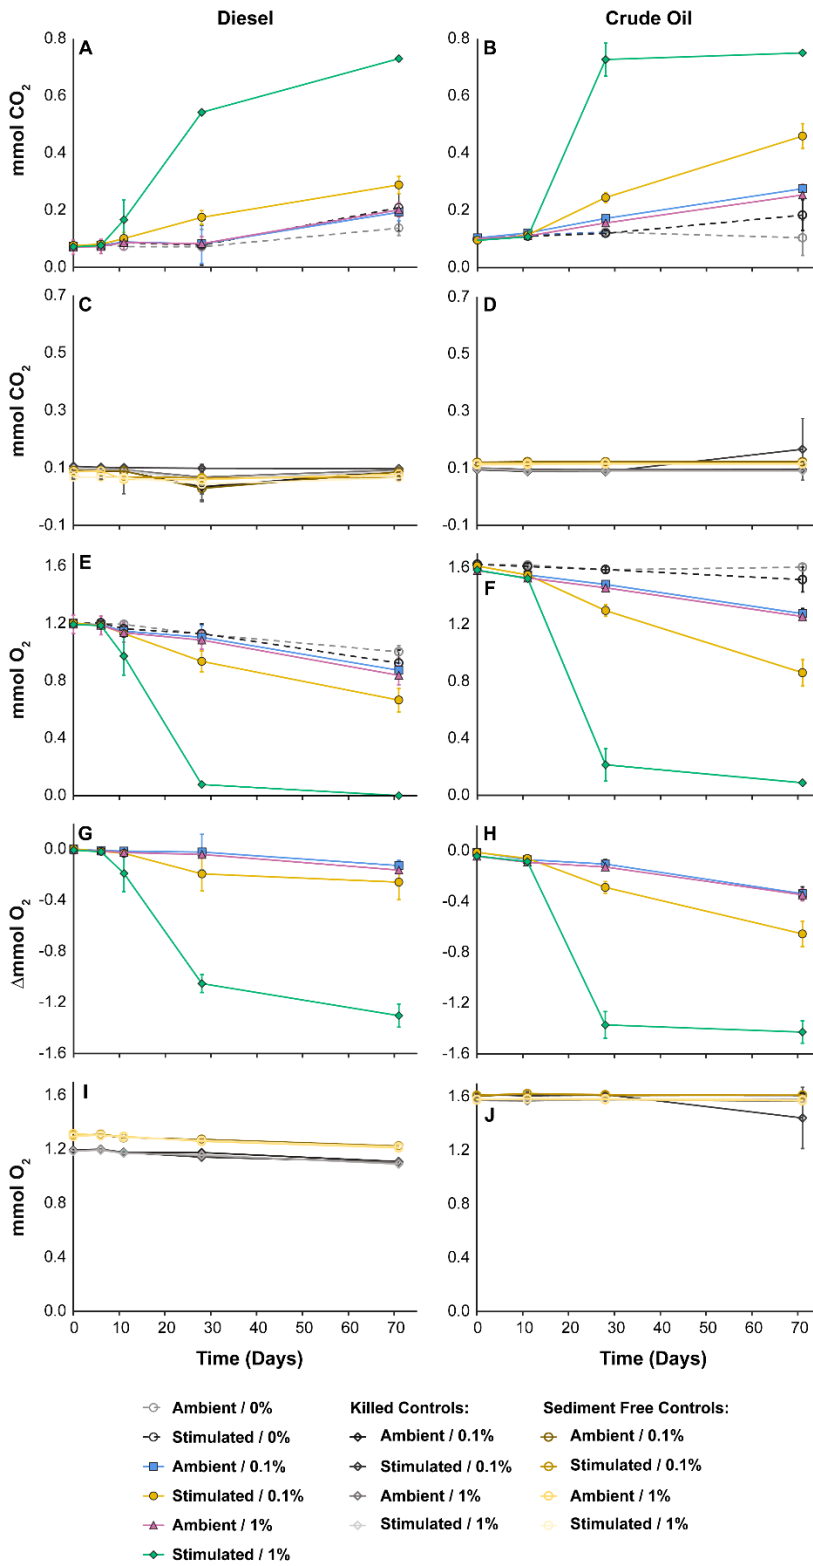

35



36 **FIG S1:** Values of CO<sub>2</sub> and O<sub>2</sub> (mmol) within diesel- (left) and crude oil-amended (right)  
37 sediment microcosms obtained using GC over 71 days of incubation at 4°C. Data points  
38 represent the mean of three replicate microcosms established with three separate sediment core  
39 casts with error bars as standard deviation. Panels A-B (CO<sub>2</sub>) and E-F (O<sub>2</sub>) show absolute values  
40 of gases within the headspace of the microcosms, with hydrocarbon amended microcosms (solid  
41 lines) and unamended control microcosms (dashed lines). In panels G-H the Δ represents the  
42 difference between unamended and amended microcosms, the equivalent for CO<sub>2</sub> is reported in  
43 Fig. 2E-F. Panels C-D and I-J present gas data from the sediment free and killed control  
44 microcosms, whereby no change was observed over the duration of the incubations. Only one  
45 crude oil killed replicate (Stimulated / 0.1%) was found to be contaminated, showing elevated  
46 CO<sub>2</sub> and reduced O<sub>2</sub> after 28 days of incubation.

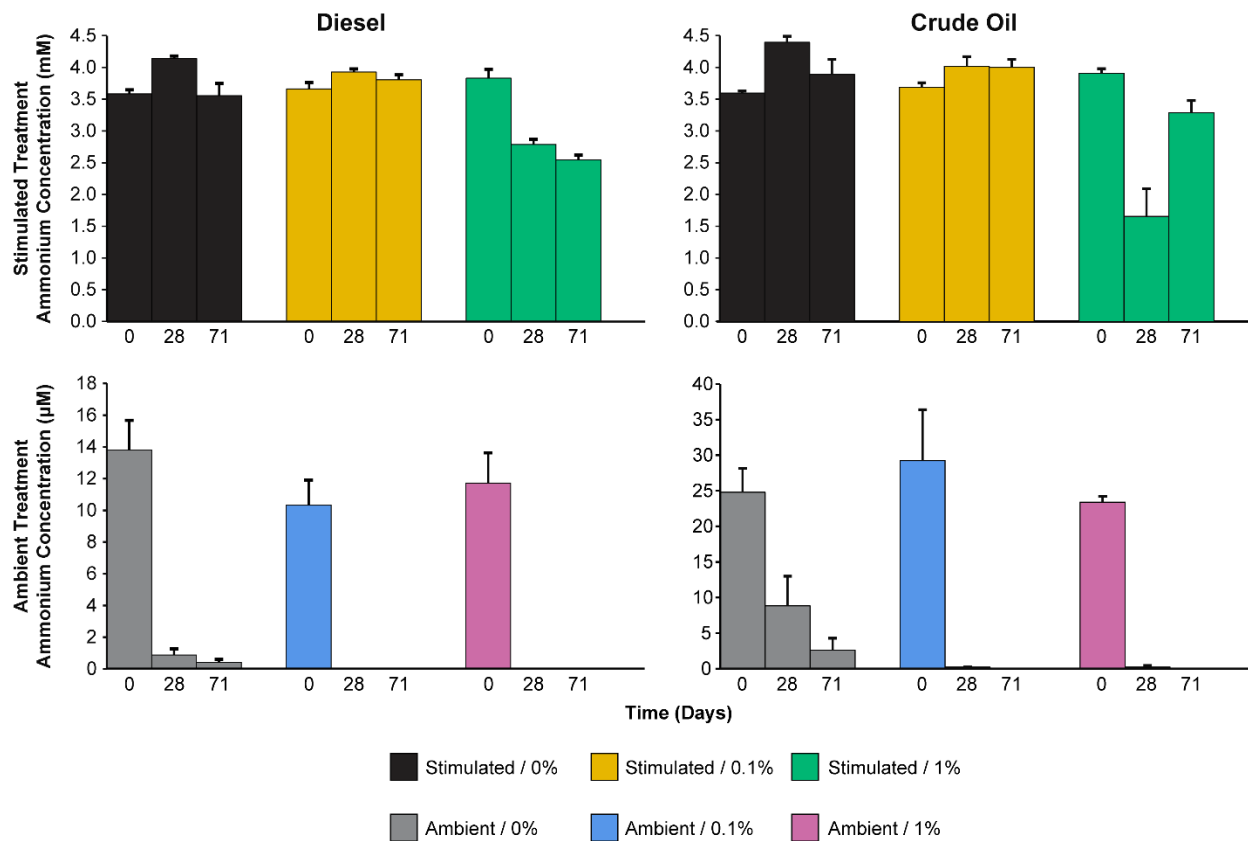

47

48 **FIG S2:** Ammonium concentrations within treatments and controls at 0, 28, and 71 days of  
 49 incubation within diesel (left) and crude oil (right) amended microcosms. Triplicate microcosms  
 50 are averaged with error bars as standard error. In both diesel and crude oil microcosms, ambient  
 51 nutrient treatments were rapidly depleted of ammonium. Note that the concentrations are  
 52 reported differently for ambient ( $\mu\text{M}$ ) and nutrient stimulated (mM) treatments.

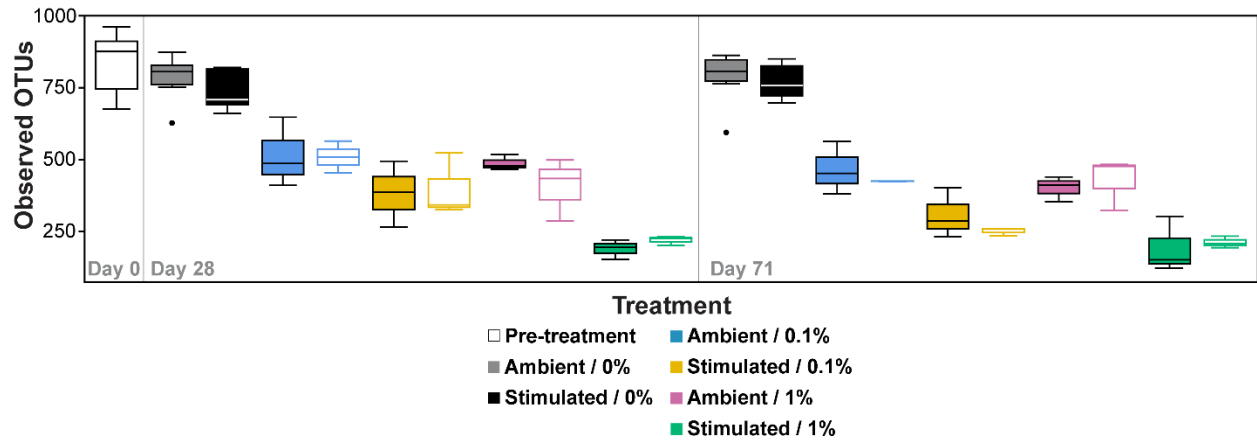

53

54 **FIG S3:** Observed OTUs (i.e., richness) for each treatment group, with the central band  
 55 representing the median among replicates, the box containing 50% of observations, and whiskers  
 56 extending to the lowest and highest values excluding outliers (separate points).

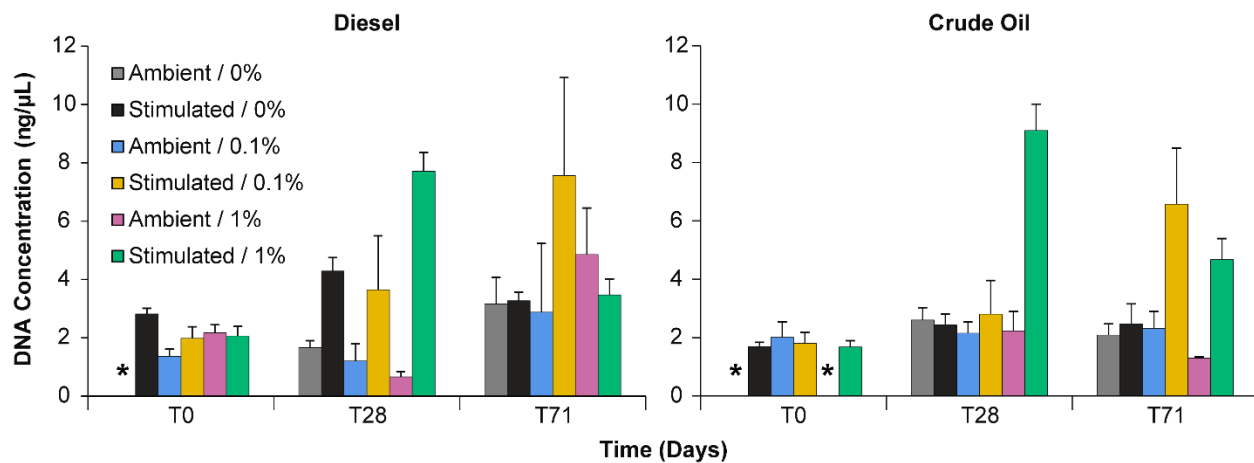

57

58 **FIG S4:** DNA concentrations within treatments and controls at 0, 28, and 71 days of incubation

59 within diesel- and crude oil-amended microcosms. Triplicate microcosms are averaged with

60 standard error bars. Day 0 ambient nutrient treatments marked as \* were not analysed since they

61 were not expected to be different from nutrient stimulated treatments.

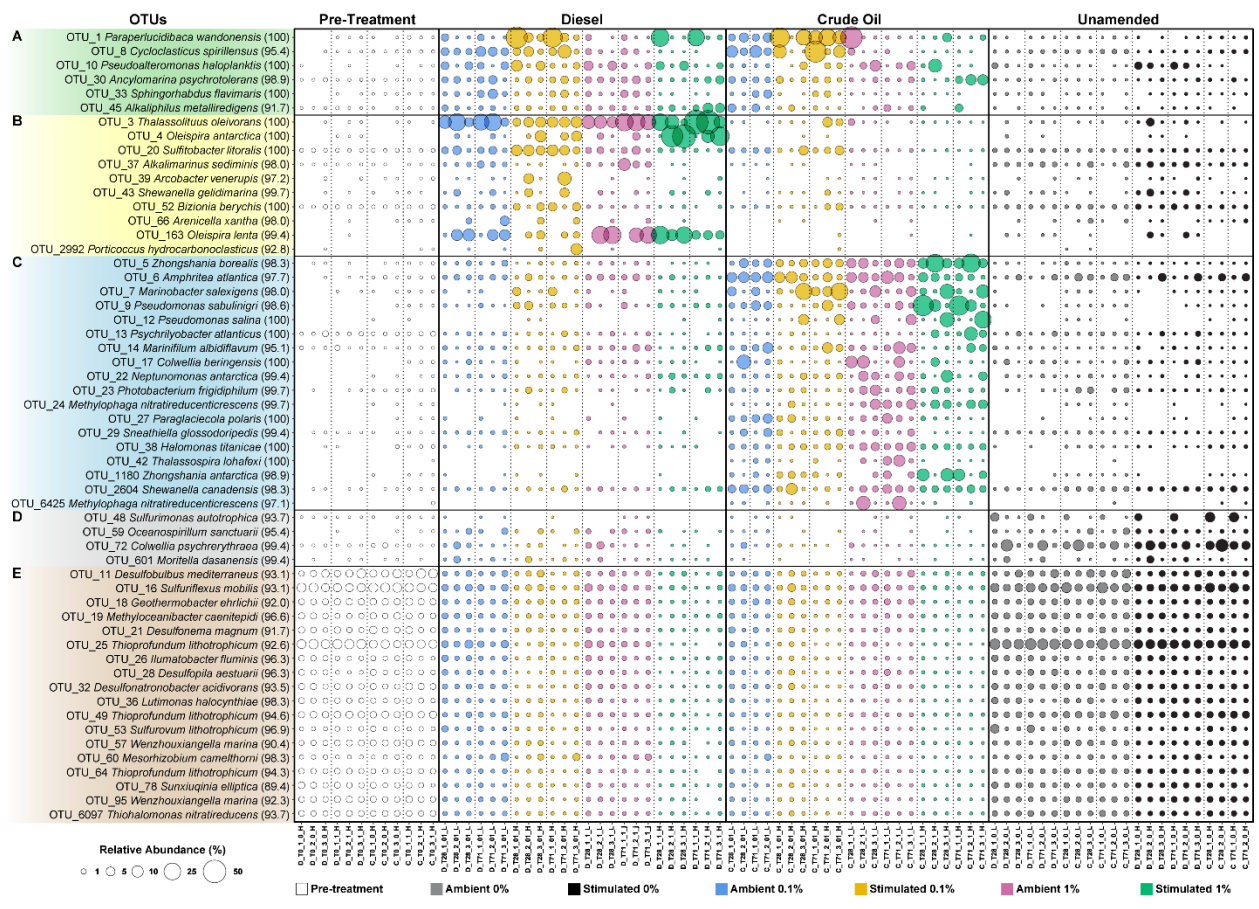

62

63 **FIG S5:** Relative sequence abundance of OTUs with significant associations to diesel or crude  
 64 oil input after 28 and 71 days of incubation at 4°C (XRF DATASET S4). Bubble size indicates  
 65 OTU relative abundance (%), with missing bubbles indicating no sequence reads. OTUs are  
 66 labeled according to closest relatives identified following NCBI BLAST searching with  
 67 sequence identities (%) shown in parentheses. OTUs are grouped according to significant  
 68 associations identified by “indicspecies” as those strongly correlated to both diesel and crude oil  
 69 contamination (A), those correlated to the presence of diesel only (B), crude oil only (C),  
 70 unamended controls (D), or of the original uncontaminated sediment (E).
